# Supplementary material for: Inducible nitric oxide synthase and systemic lupus erythematosus: a systematic review and meta-analysis
Source: PubMed Central journal article supplement (PMC7027241; doi:10.1186/s12865-020-0335-7), 2020-02-17

A

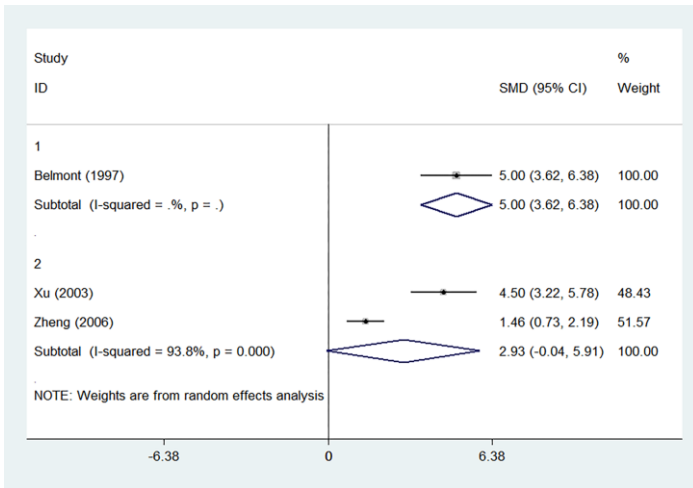

B

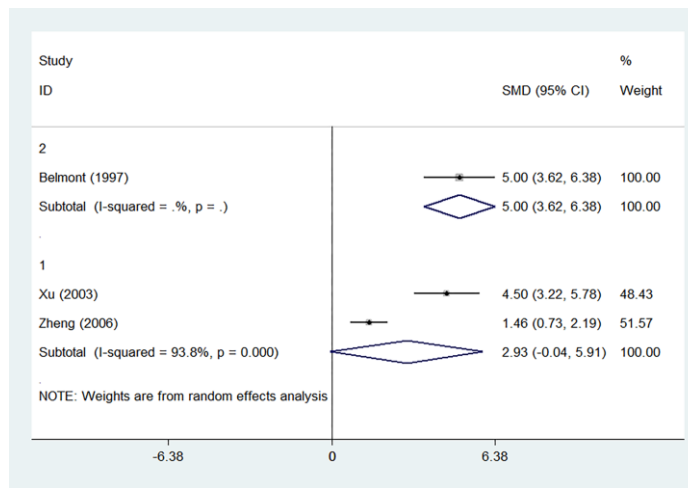

C

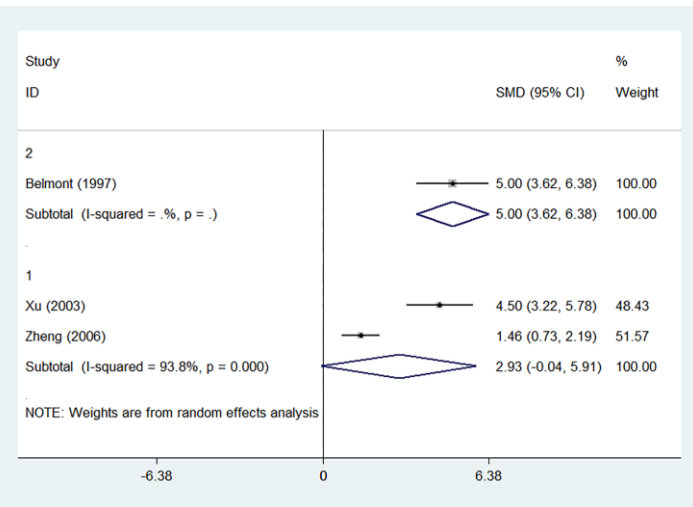

D

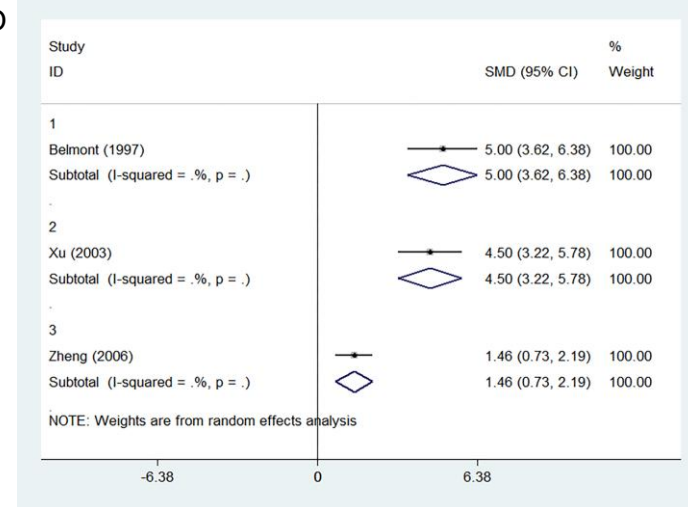

Supplement: 12865_2020_335_MOESM2_ESM.pdf [file 12865_2020_335_MOESM2_ESM.pdf]
